# Supplementary material for: Sonochemical synthesis of Zr-based metal–organic cages and their adsorption performance towards tartrazine
Source: Royal Society of Chemistry journal article supplement (doi:10.1039/d4ce01097c), 2025-01-01
Supplement: d4ce01097c1.pdf [file d4ce01097c1.pdf]

## Supporting Information

### **Sonochemical Synthesis of Zr-based metal-organic cages and their adsorption performance towards Tartrazine**

De-Sheng Wei,<sup>a</sup> Jian Li,<sup>a</sup> Ting-Ting Xu,<sup>a</sup> Wan-Yi Lan,<sup>a</sup> Nan Lv,<sup>a</sup>  
Yu-Teng Zhang\*<sup>a</sup> and Shuang-Bao Li\*<sup>b</sup>

<sup>a</sup> *College of Chemical Engineering, Northeast Electric Power University, Jilin City 132012, PR China. E-mail: zhangyuteng@neepu.edu.cn (Y.-T. Zhang).*

<sup>b</sup> *School of Chemical and Pharmaceutical Engineering, Jilin Institute of Chemical Technology, Jilin, 132022, PR China. E-mail: lishuangbao@jlict.edu.cn (S.-B. Li)*

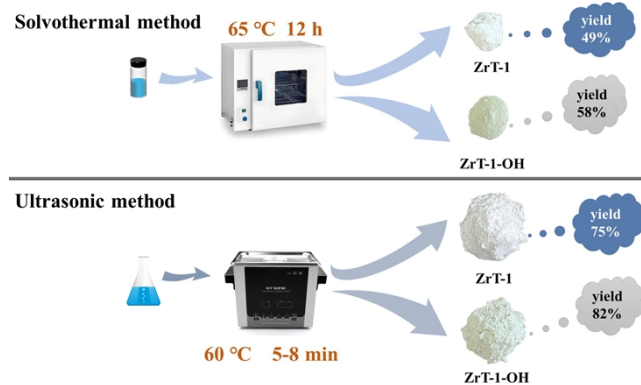

**Fig.S1** Comparison of the preparation process for Zr-MOCs based on sonochemical method and traditional solvothermal method.

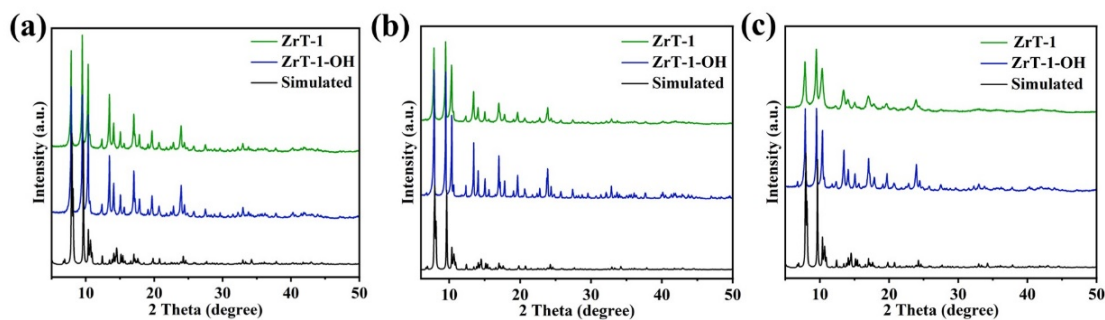

**Fig.S2** PXRD under varying synthesis conditions: (a) 150 W, 30 °C, 40 kHz; (b) 75 W, 60 °C, 40 kHz; (c) 75 W, 30 °C, 40 kHz.

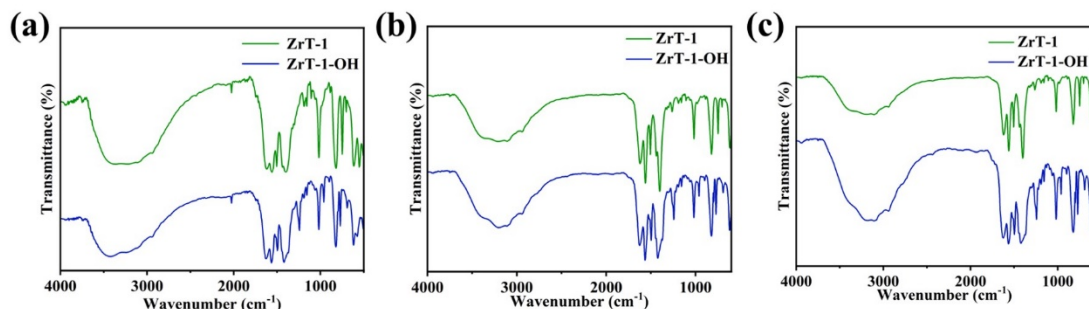

**Fig.S3** FT-IR under varying synthesis conditions: (a) 150 W, 30 °C, 40 kHz; (b) 75 W, 60 °C, 40 kHz; (c) 75 W, 30 °C, 40 kHz.

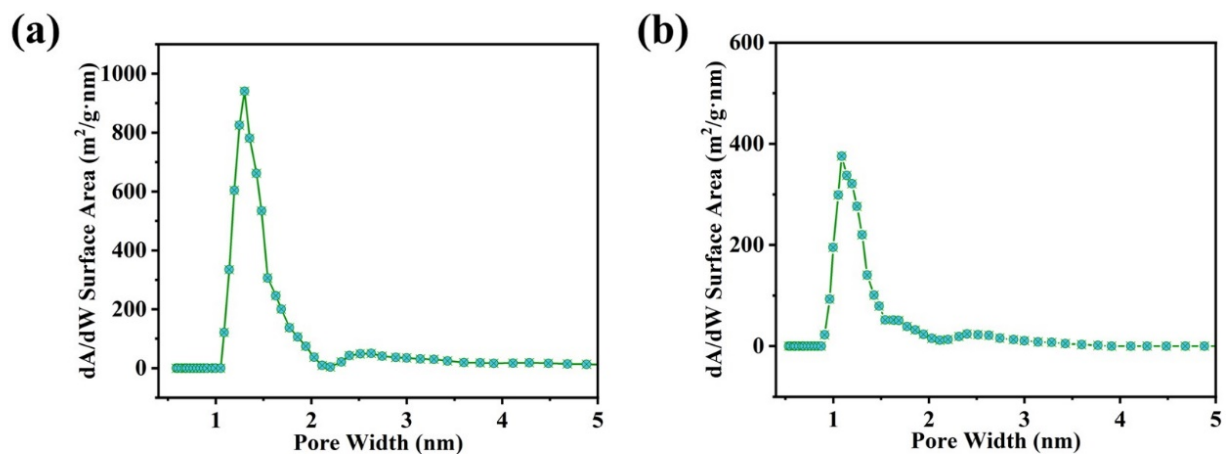

Fig.S4 Pore size of ZrT-1(a) and ZrT-1-OH(b)

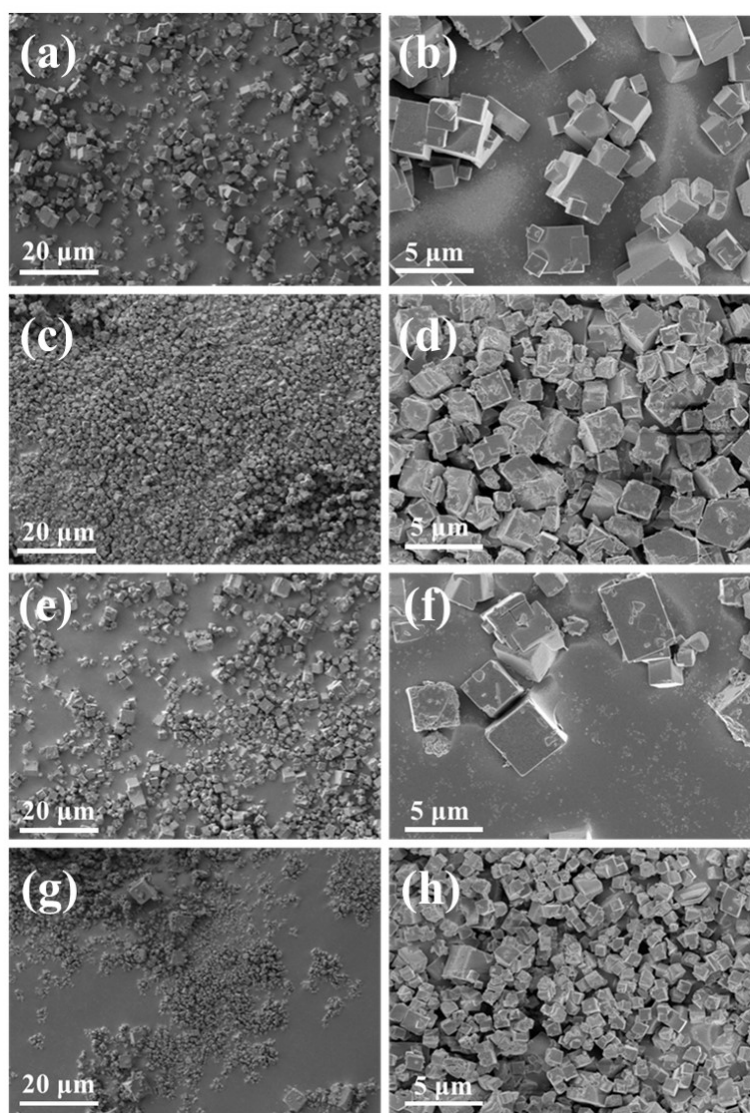

Fig.S5 SEM images of ZrT-1 (a-d) and ZrT-1-OH (e-h) under a power of 75 W: (a,b) ZrT-1, 60 °C, 40kHz; (c,d) ZrT-1, 30 °C, 40kHz; (e,f) ZrT-1-OH, 60 °C, 40kHz; (g,h) ZrT-1-OH, 30 °C, 40kHz

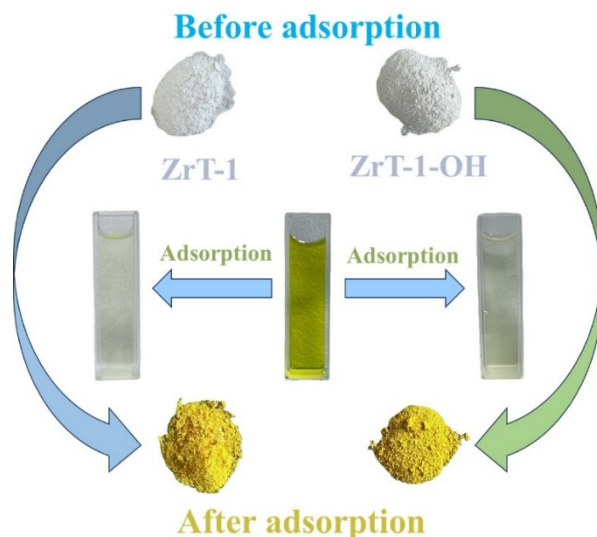

**Fig.S6** Color change of TAR solution and Zr-MOCs before and after adsorption.

**Table.S1** Comparison of adsorption capacity for TAR between synthesized Zr-MOCs and reported materials.

| Adsorbent                                                               | $Q_{\max}$<br>(mg/g) | $\text{pH}_{\text{optimum}}$ | C<br>(mg/L) | T<br>(°C) | $t_{\text{eq}}$<br>(min) | $S_{\text{BET}}$<br>( $\text{m}^2/\text{g}$ ) | Kinetic<br>model      | Isotherm<br>model | Refs.        |
|-------------------------------------------------------------------------|----------------------|------------------------------|-------------|-----------|--------------------------|-----------------------------------------------|-----------------------|-------------------|--------------|
| Porous chitosan<br>sponge                                               | 373.7                | 6.0                          | 400         | 25        | 30                       | 1150.0                                        | PSO<br>and<br>Elovich | -                 | 1            |
| Multi-walled<br>carbon nanotubes                                        | 85.09                | 3.0                          | 50          | 25        | 60                       | -                                             | PSO                   | Langmuir          | 2            |
| Activated red mud                                                       | 136.98               | 8.0                          | 100         | 20        | 30                       | -                                             | PSO                   | Langmuir          | 3            |
| Cu-DTO MOF                                                              | 309.2                | 2.0                          | 25          | 50        | 30                       | 119.6                                         | PSO                   | Freundlich        | 4            |
| Chitosan-grafted<br>Polyaniline                                         | 584.0                | 7.2                          | 400         | 25        | 120                      | -                                             | PSO                   | Freundlich        | 5            |
| Double-layered<br>hydroxide (ZnCl <sub>2</sub> ,<br>AlCl <sub>3</sub> ) | 282.48               | 6.0                          | 40          | 25        | 60                       | -                                             | PSO                   | Langmuir          | 6            |
| Co <sub>3</sub> O <sub>4</sub><br>nanoparticles                         | 204.3                | 4.0                          | 100         | 40        | 90                       | -                                             | PSO                   | Freundlich        | 7            |
| UiO-66@PVDF<br>MOF beads                                                | 77.51                | 2.0                          | 40          | 50        | 120                      | 360.74                                        | PSO                   | Langmuir          | 8            |
| ZrT-1                                                                   | 238.6                | 3.0                          | 50          | 25        | 65                       | 424.2033                                      | PSO                   | Langmuir          | This<br>work |
| ZrT-1-OH                                                                | 225.3                | 3.0                          | 50          | 25        | 65                       | 853.7193                                      | PSO                   | Langmuir          | This<br>work |

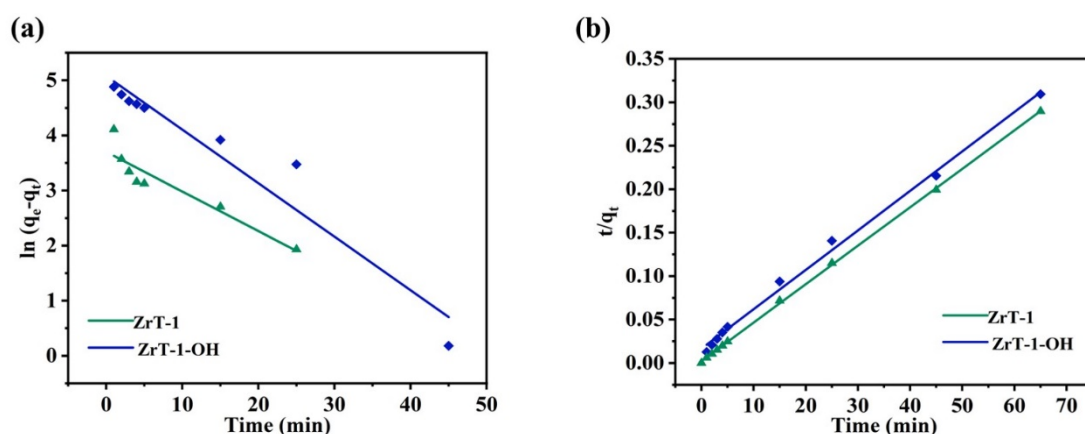

**Fig.S7** Curves of pseudo-first-order (a) and pseudo-second-order (b) kinetics of TRA for Zr-MOCs.

**Table S2** The equilibrium capacities, pseudo-second-order rate constant, pseudo-second order rate constant and R2 values of Zr-MOCs for dyes adsorption.

| Adsorbent<br>Dye | Pseudo-first-order |         |                   |       | Pseudo-second-order |                   |       |
|------------------|--------------------|---------|-------------------|-------|---------------------|-------------------|-------|
|                  | $q_e$ (exp)(mg/g)  | $K_1$   | $q_e$ (cal)(mg/g) | $R^2$ | $K_2$               | $q_e$ (cal)(mg/g) | $R^2$ |
| ZrT-1            | 224.31653          | -0.0719 | 40.45             | 0.868 | -0.00442            | 226.244           | 0.999 |
| ZrT-1-OH         | 210.11212          | -0.0972 | 160.29            | 0.934 | -0.00454            | 220.26            | 0.996 |

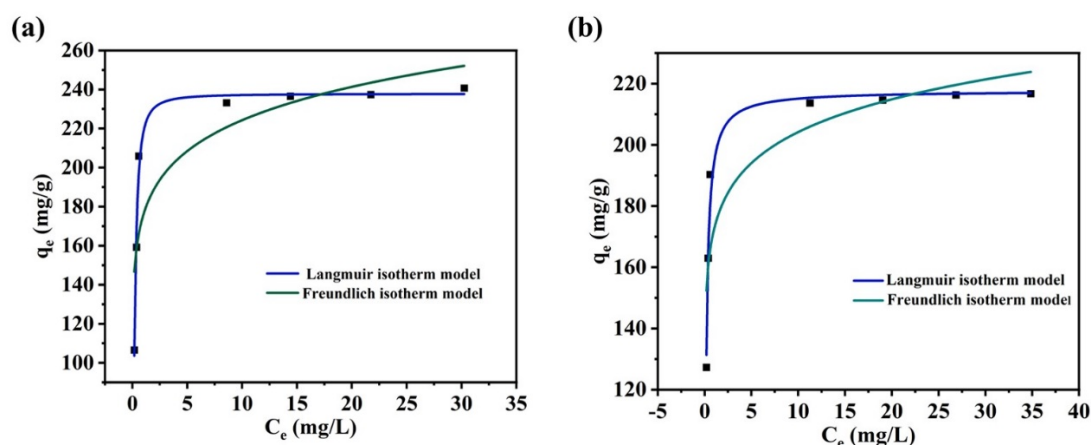

**Fig.S8** ZrT-1 (a) and ZrT-1-OH (b) fitting by Langmuir isotherm model and Freundlich isotherm model.

**Table S3** Parameter values for different kinetic models

|          | Langmuir isothermal |           |       | Freundlich isothermal |        |       |
|----------|---------------------|-----------|-------|-----------------------|--------|-------|
|          | $K_L$               | $q_{max}$ | $R^2$ | $K_F$                 | $1/n$  | $R^2$ |
| ZrT-1    | 5.44                | 241.9     | 0.96  | 175.85                | 0.1057 | 0.78  |
| ZrT-1-OH | 8.2                 | 217.7     | 0.98  | 172.37                | 0.0736 | 0.82  |

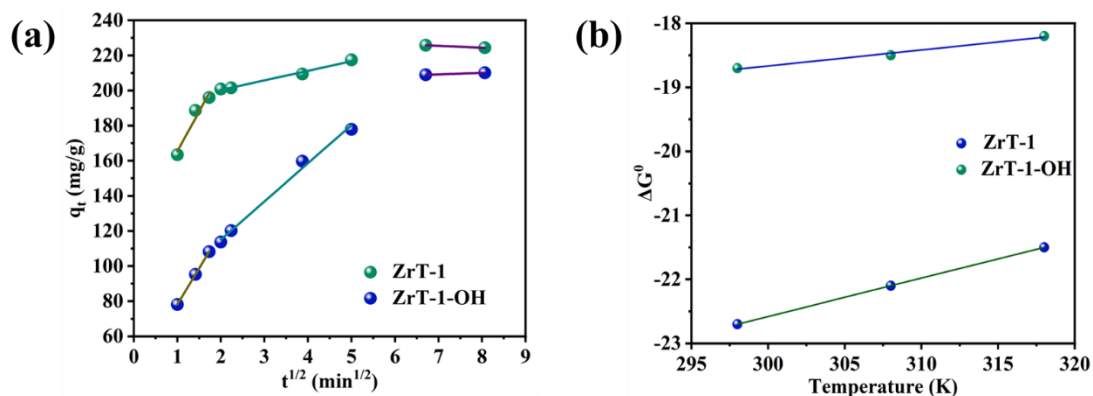

Fig.S9 Fitting by intra-particle diffusion kinetic models (a) and adsorption thermodynamic models (b).

Table S4 Thermodynamic parameters for the adsorption of TAR using ZrT-1 and ZrT-1-OH.

|          | $\Delta G/ \text{KJ mol}^{-1}$ |       |       | $\Delta H/ \text{KJ mol}^{-1}$ | $\Delta S/ \text{KJ mol}^{-1} \text{k}^{-1}$ |
|----------|--------------------------------|-------|-------|--------------------------------|----------------------------------------------|
|          | 298K                           | 308K  | 318K  |                                |                                              |
| ZrT-1    | -22.7                          | -22.1 | -21.5 | -41.1                          | -0.06                                        |
| ZrT-1-OH | -18.7                          | -18.5 | -18.2 | -26.8                          | -0.03                                        |

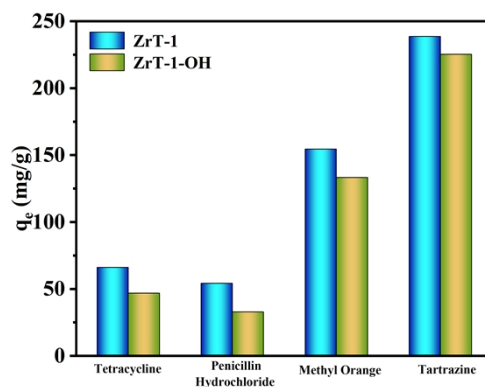

Fig.S10 The adsorption capacity of Zr-MOCs for four pollutants.

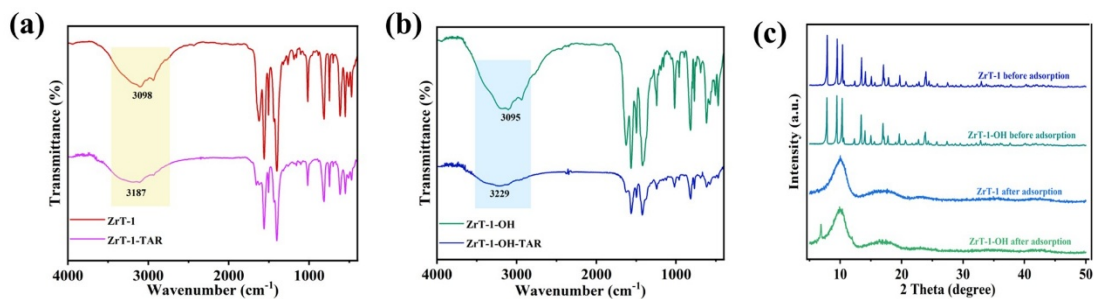

Fig.S11 FT-IR spectra of ZrT-1 (a) and ZrT-1-OH (b) before and after adsorption, along with XRD patterns (c) for comparison before and after adsorption.

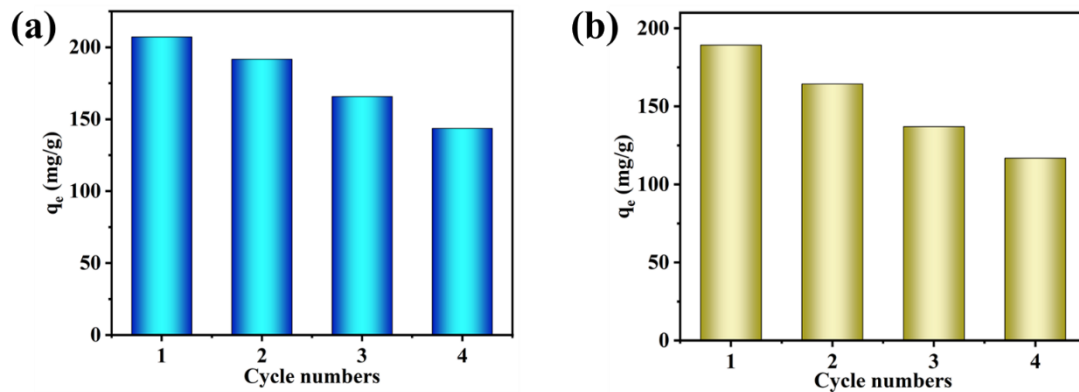

Fig.S12 Adsorption capacity of ZrT-1 (a) and ZrT-1 (a) ZrT-1-OH (b) under different cycles.

## Reference

- [S1] V. M. Esquerdo, T. M. Quintana, G. L. Dotto and L. A. A. Pinto, *React. Kinet., Mech. Catal.*, 2015, **116**, 105–117.
- [S2] J. Goscianska and R. Pietrzak, *Catal. Today*, 2015, **249**, 259–264.
- [S3] R. K. Gautam, S. Banerjee, M. A. Sanroman and M. C. Chattopadhyaya, *J. Environ. Chem. Eng.*, 2017, **5**, 328–340.
- [S4] I.-G. Bacioiu, L. Stoica, C. Constantin and A.-M. Stanescu, *Water, Air, Soil Pollut.*, 2017, **228**, 298.
- [S5] S. Sahnoun and M. Boutahala, *Int. J. Biol. Macromol.*, 2018, **114**, 1345–1353.
- [S6] H. Ouassif, E. M. Moujahid, R. Lakhale, R. Sadik, F. Z. Bouragba, E. M. Sabbar and M. Diouri, *Surf. Interfaces*, 2020, **18**, 100401.
- [S7] B. Zafar, S. S. Shafqat, M. N. Zafar, S. Haider, S. H. Sumrra, M. Zubair, N. Alwadai, F. H. Alshammari, A. S. Almuslem and M. S. Akhtar, *Mater. Today Commun.*, 2022, **33**, 104946.
- [S8] H. Singh, A. Goyal, S. K. Bhardwaj, M. Khatri and N. Bhardwaj, *Mater. Sci. Eng.: B*, 2023, **288**, 116165.
